# Supplementary material for: 5-Demethoxy-10′-ethoxyexotimarin F, a New Coumarin with MAO-B Inhibitory Potential from Murraya exotica L.
Source: MDPI journal article supplement (doi:10.3390/molecules27154950), 2022-08-03
Supplement: s1 [file s1]

Supplementary Materials

## 5-Demethoxy-10'-ethoxyexotimarin F, a New Coumarin with MAO-B Inhibitory Potential from *Murraya exotica* L.

Zhen-Ru Xia-Hou <sup>1,†</sup>, Xiao-Fei Feng <sup>2,†</sup>, Yu-Fei Mei <sup>1</sup>, Yin-Yan Zhang <sup>1</sup>, Tong Yang <sup>1</sup>, Jie Pan <sup>1</sup>, Jing-Hua Yang <sup>1,\*</sup> and Yun-Song Wang <sup>1,\*</sup>

<sup>1</sup> Key Laboratory of Medicinal Chemistry for Natural Resource, Ministry of Education, Yunnan Provincial Center for Research & Development of Natural Products, School of Chemical Science and Technology, Yunnan University, Kunming 650091, China; xhxr546552125@163.com (Z.-R.X.-H.); ynu2012@163.com (Y.-F.M.); zyy20220730@163.com (Y.-Y.Z.); yangtongkm@163.com (T.Y.); panjie8668@163.com (J.P.)

<sup>2</sup> Faculty of Life Science, Southwest Forestry University, Kunming 650224, China; xiaofei@swfu.edu.cn (X.-F.F.)

\* Correspondence: yangjh@ynu.edu.cn (J.-H.Y.); wangys@ynu.edu.cn (Y.-S.W.)

† These authors contributed equally to this work.

### List of Figures

**Figure S1.** <sup>1</sup>H NMR spectrum of **1** in CDCl<sub>3</sub>

**Figure S2.** <sup>13</sup>C NMR and DEPT spectra of **1** in CDCl<sub>3</sub>

**Figure S3.** HSQC spectrum of **1** in CDCl<sub>3</sub>

**Figure S4.** HMBC spectrum of **1** in CDCl<sub>3</sub>

**Figure S5.** <sup>1</sup>H-<sup>1</sup>H COSY spectrum of **1** in CDCl<sub>3</sub>

**Figure S6.** ROESY spectrum of **1** in CDCl<sub>3</sub>

**Figure S7.** HRESIMS spectrum of **1**

**Figure S8.** UV spectrum of **1**

**Figure S9.** CD spectrum of **1**

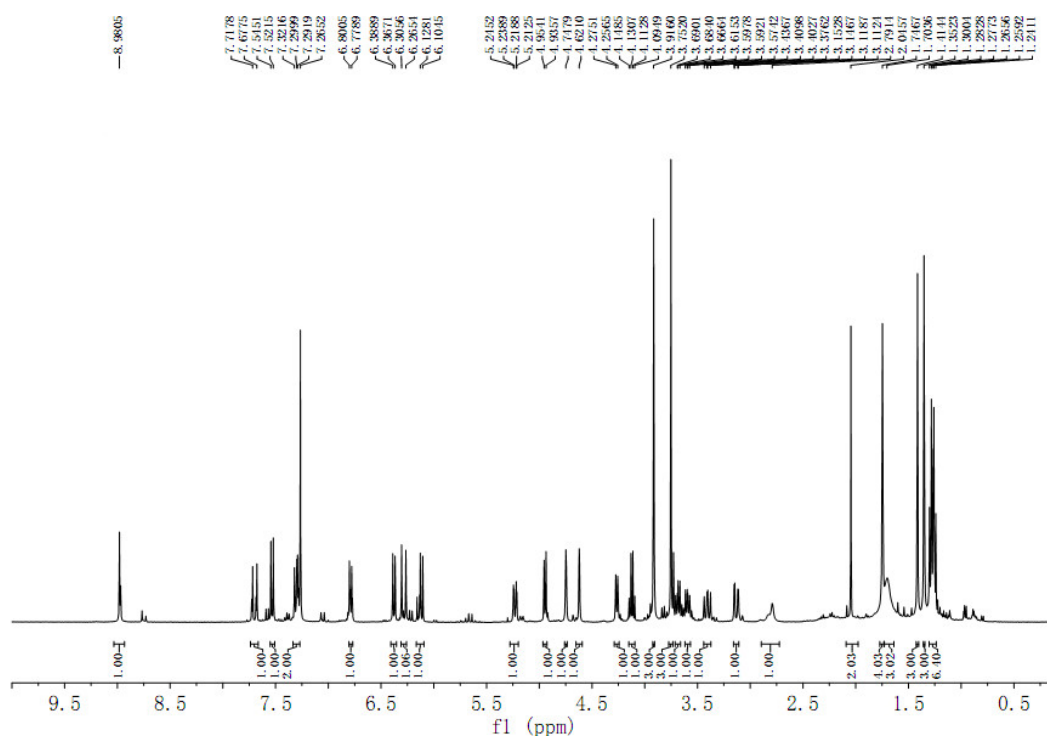Figure S1.  $^1\text{H}$  NMR spectrum of **1** in  $\text{CDCl}_3$ 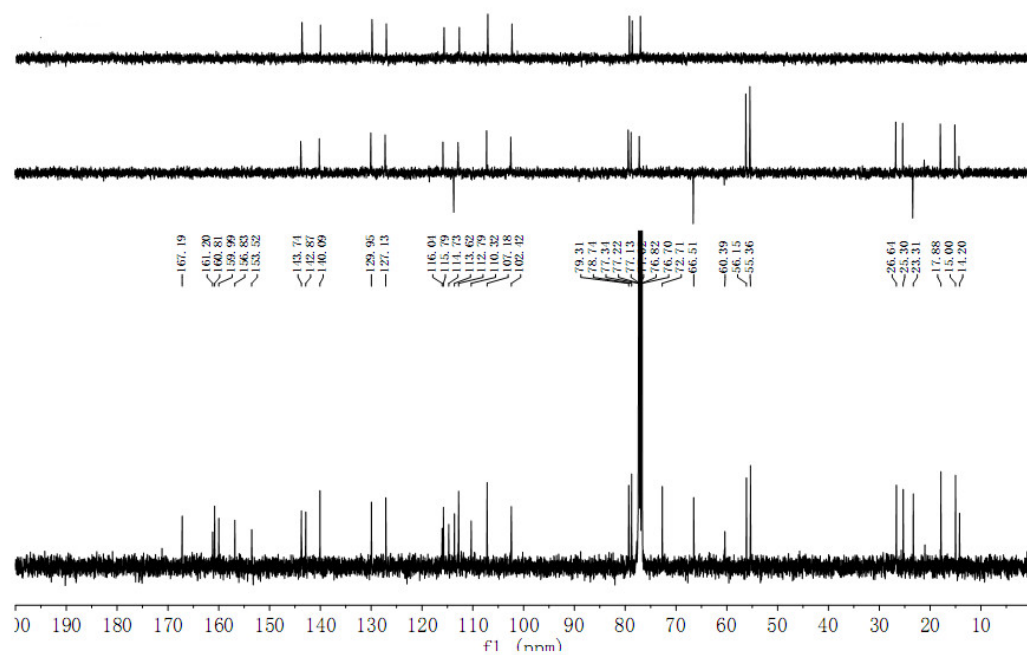Figure S2.  $^{13}\text{C}$  NMR and DEPT spectra of **1** in  $\text{CDCl}_3$

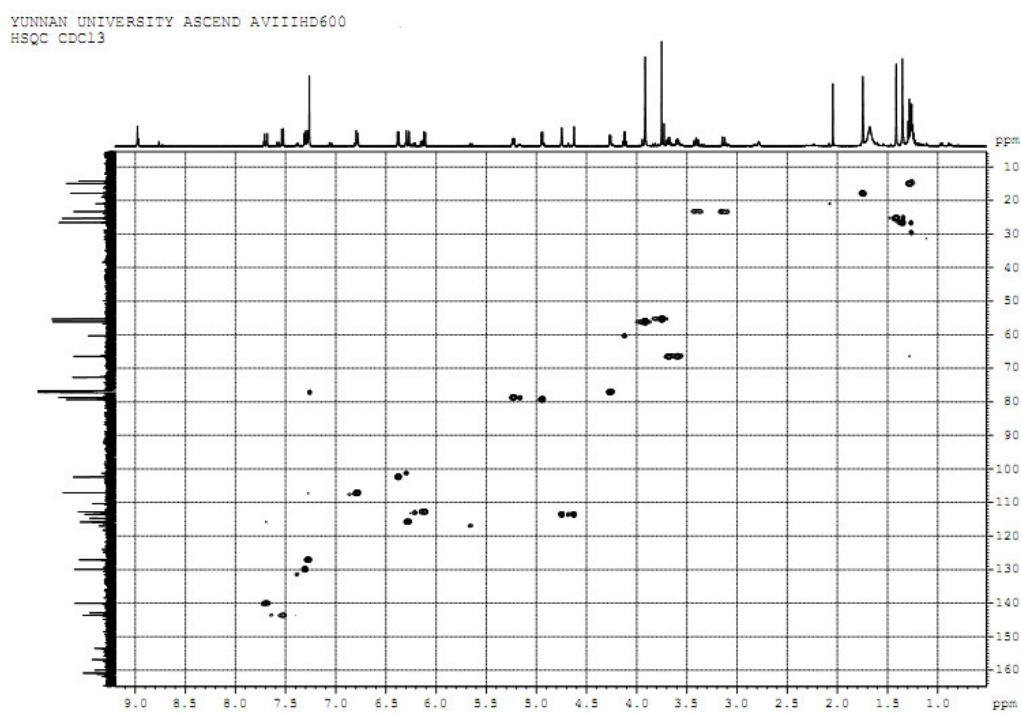

**Figure S3.** HSQC spectrum of **1** in CDCl<sub>3</sub>

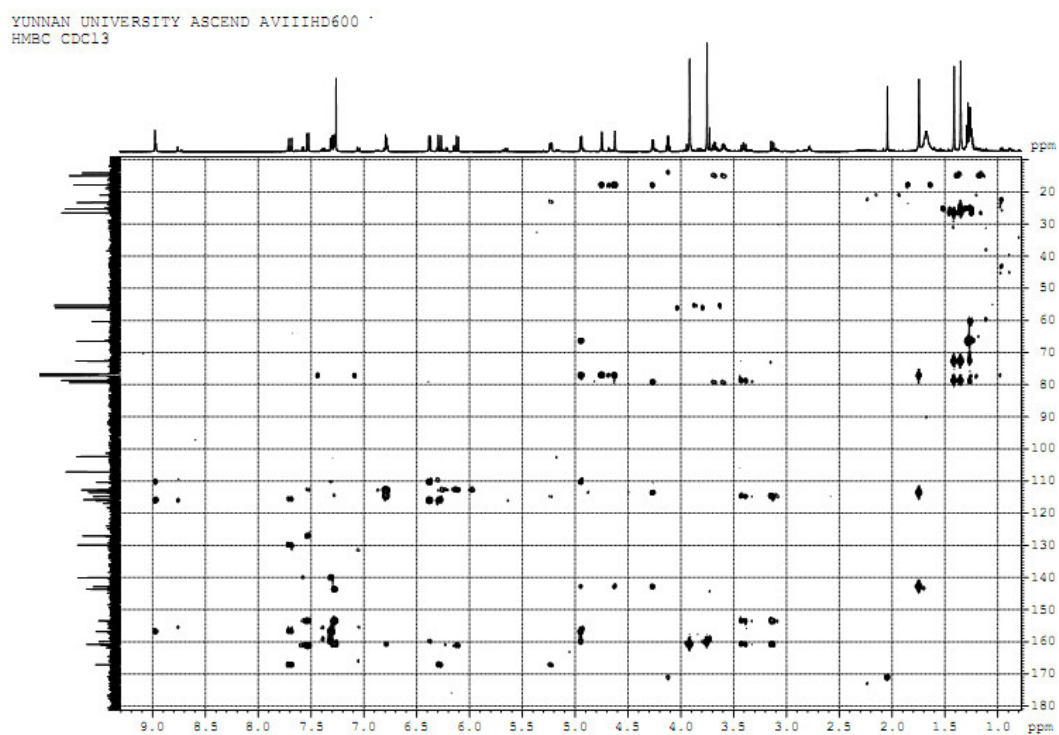

**Figure S4.** HMBC spectrum of **1** in CDCl<sub>3</sub>

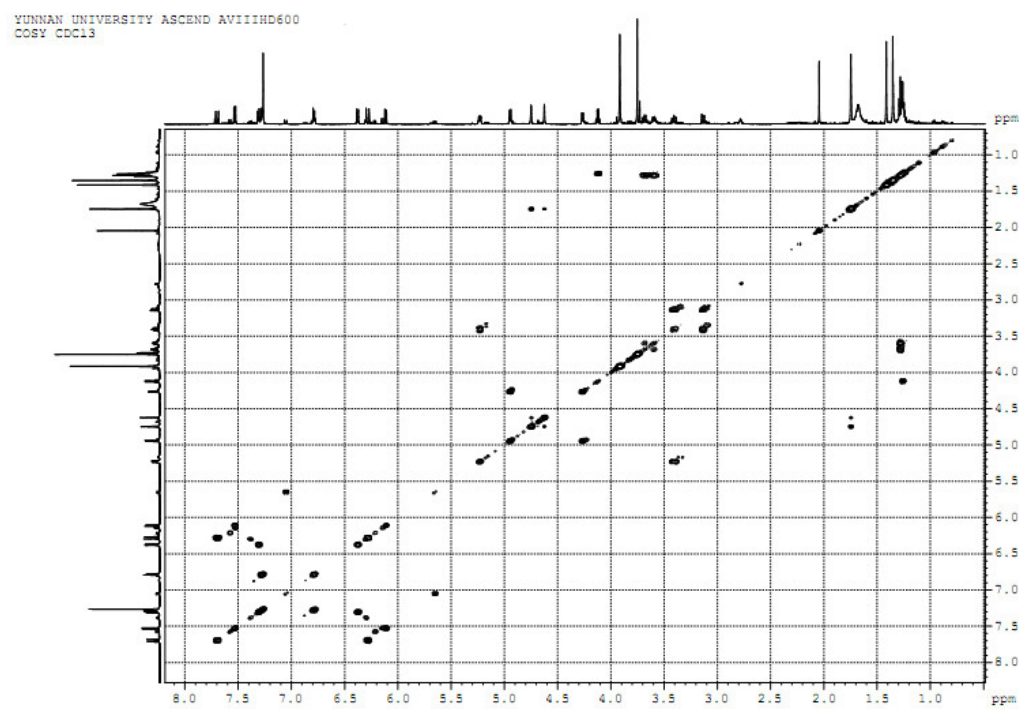

Figure S5.  $^1\text{H}$ - $^1\text{H}$  COSY spectrum of **1** in  $\text{CDCl}_3$

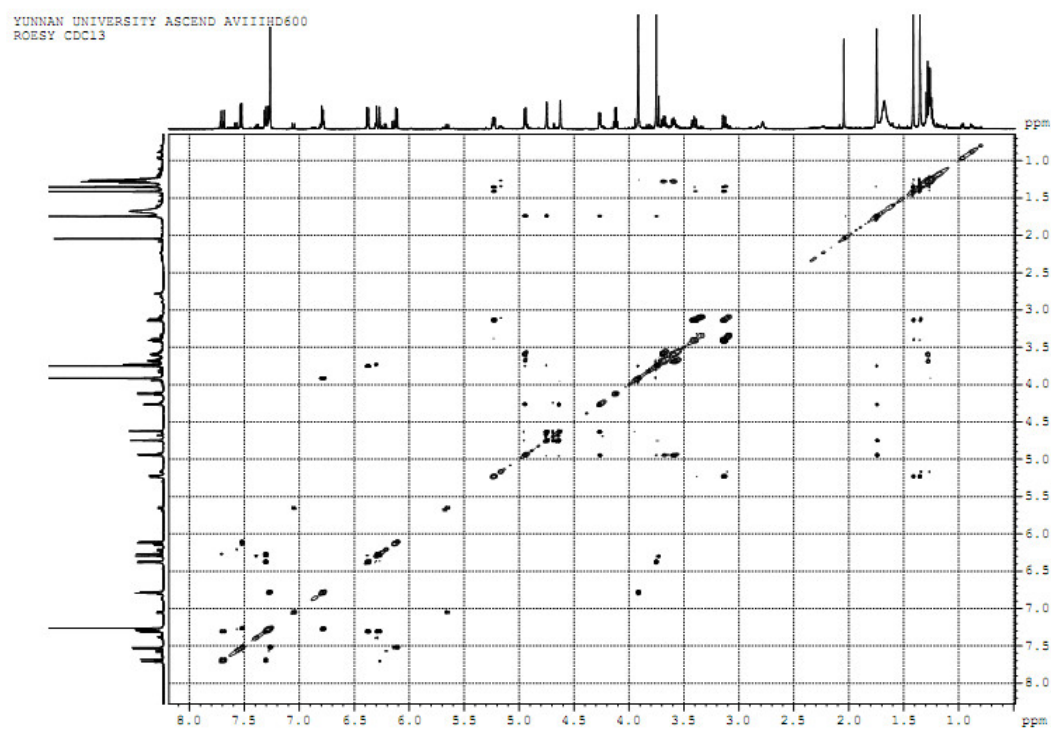

Figure S6. ROESY spectrum of **1** in  $\text{CDCl}_3$

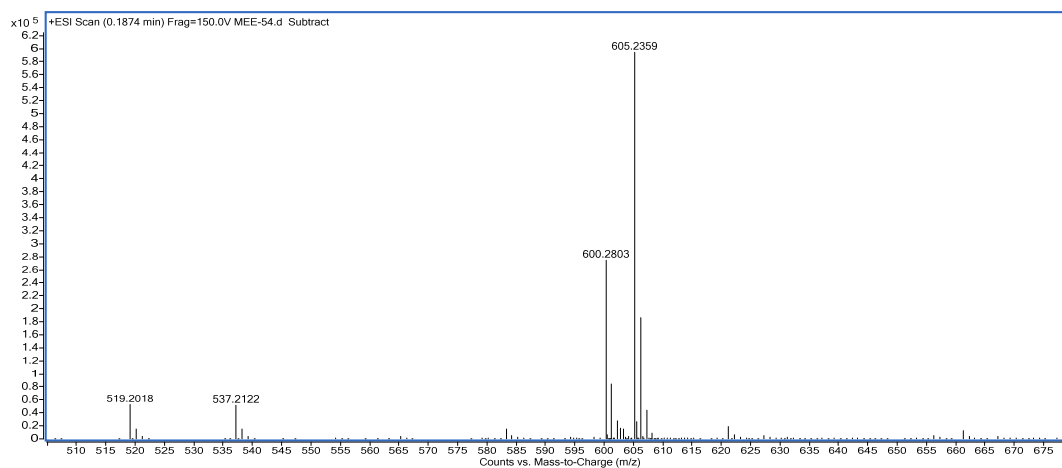

MS Formula Results: + Scan (0.1874 min)

| m/z      | Ion                  | Formula       | Abundance |
|----------|----------------------|---------------|-----------|
| 600.2803 | (M+NH4) <sup>+</sup> | C32H42N O10   | 274790.1  |
| Best     | Formula (M)          | Ion Formula   | Score     |
| ✓        | C32H38 O10           | C32H42N O10   | 74.87     |
|          |                      | Cross Score   | Calc m/z  |
|          |                      |               | 600.2803  |
|          |                      | Diff (ppm)    | 0         |
|          |                      | Mass Match    | 100       |
|          |                      | Abund Match   | 53.4      |
|          |                      | Spacing Match | 49.54     |
| m/z      | Ion                  | Formula       | Abundance |
| 605.2359 | (M+Na) <sup>+</sup>  | C32H38Na O10  | 594872.8  |
| Best     | Formula (M)          | Ion Formula   | Score     |
| ✓        | C32H38 O10           | C32H38Na O10  | 97.29     |
|          |                      | Cross Score   | Calc m/z  |
|          |                      |               | 605.2357  |
|          |                      | Diff (ppm)    | +0.39     |
|          |                      | Mass Match    | 99.82     |
|          |                      | Abund Match   | 92.88     |
|          |                      | Spacing Match | 97.58     |

Figure S7. HRESIMS spectrum of **1**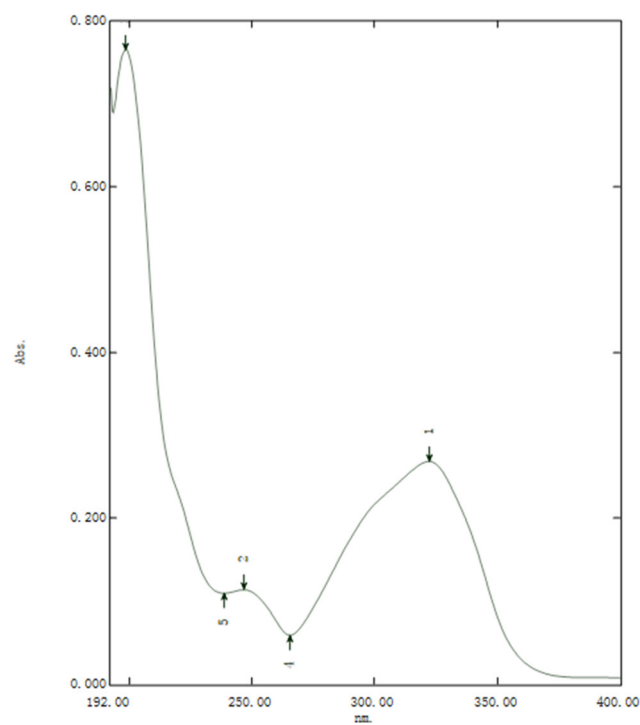Figure S8. UV spectrum of **1**

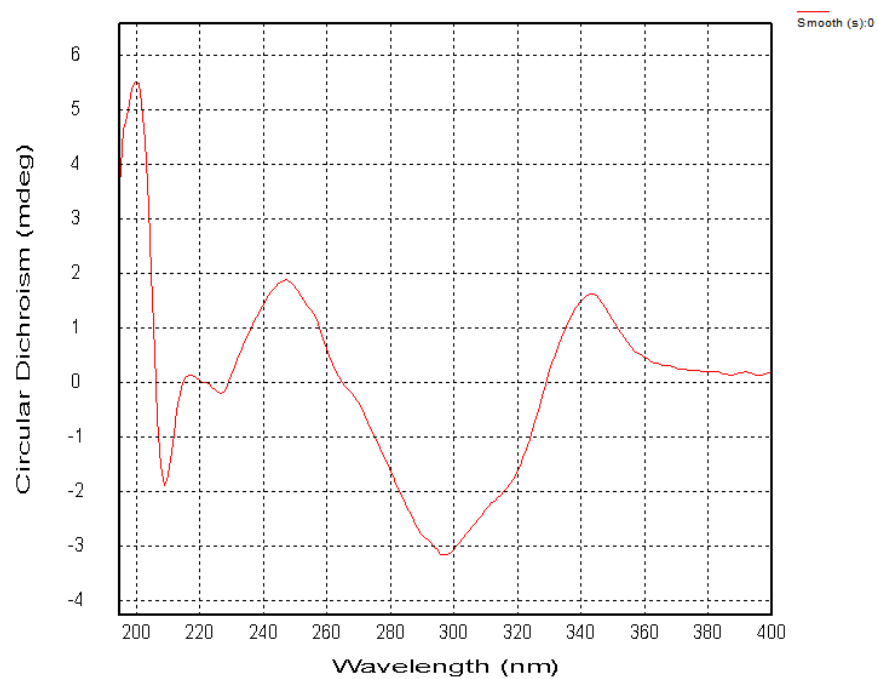

**Figure S9.** CD spectrum of **1**
